# Supplementary material
Source: publisher figshare collection journal article supplement (https://acs.figshare.com/ndownloader/files/16370435)
Supplement: Supplementary file 1 [file 16370435]

FTIR spectra of Spent coffee residue and its biochars

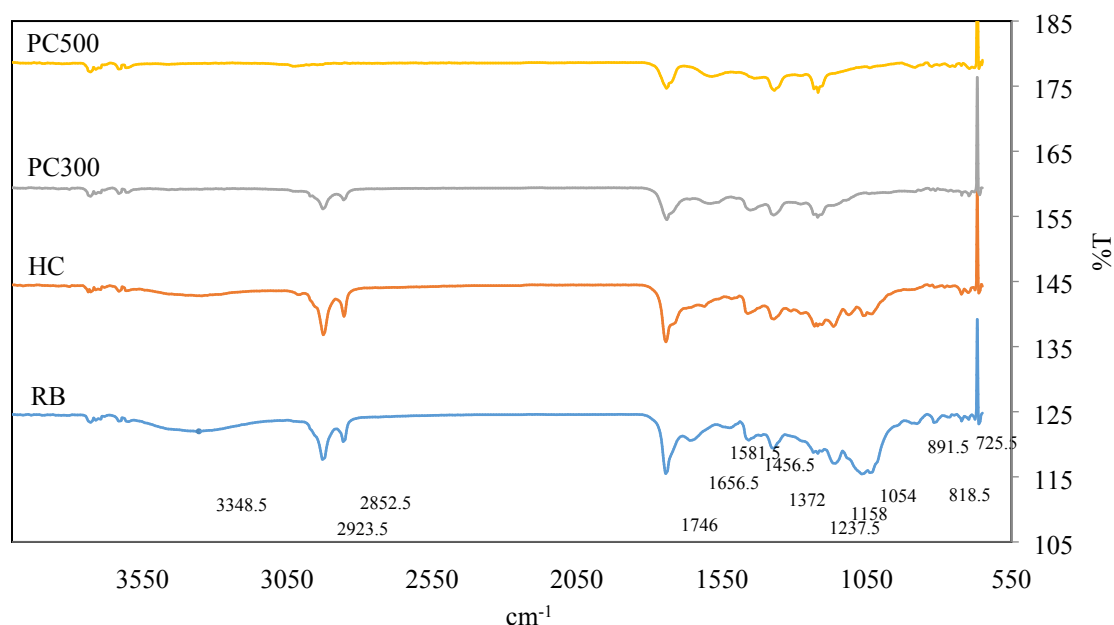

The intensity of two peaks between 2930-2850  $\text{cm}^{-1}$  resulting from C-H stretching vibration in cellulose and lignin decreased in PC300 and they disappeared in PC500. The peak at 1746  $\text{cm}^{-1}$  representing the C=O stretching of unconjugated ketone of lignin and/or cellulose are observed in all feedstocks. Similarly, the peak at 1456  $\text{cm}^{-1}$  representing  $\text{CH}_2$  deformation stretching (lignin) and the peak at 1372  $\text{cm}^{-1}$  representing aliphatic C-H stretching in methyl and phenol OH are observed in all feedstocks. The peaks at 1158 and 1054  $\text{cm}^{-1}$  represent C-O-C asymmetric stretching (in cellulose) and C-O stretching vibration (cellulose and hemicellulose) disappeared in PC300 and PC500 (39). C-H bending aromatic out-of-plane deformation of lignin observed at all samples at 818.5  $\text{cm}^{-1}$  between 725  $\text{cm}^{-1}$ . The peak at 1581  $\text{cm}^{-1}$  representing conjugated C=O stretching and aromatic C=C vibration was only observed only in PC300 and PC500.
